# Supplementary material for: Extraction process of sulfur compounds from fuels with protic ionic liquids
Source: Royal Society of Chemistry journal article supplement (doi:10.1039/c4ra16186f), 2015-01-01
Supplement: c4ra16186f1.pdf [file c4ra16186f1.pdf]

## Supporting information

**Fig. S1**  $^1\text{H}$  NMR spectrum of  $[\text{DMAPN}]^+[\text{Pr}]^-$

**Fig. S2** Analysis of standard curve (T)

**Fig. S3** Analysis of standard curve (BT)

**Fig. S4**  $^1\text{H}$  NMR of different molar ratio ( $[\text{DMAPN}]^+[\text{Pr}]^-/\text{BT}$ )

(a) 1:0 (b) 1:0.1 (c) 1:0.5 (d) 1:1 (e) 0:1

Fig. S1

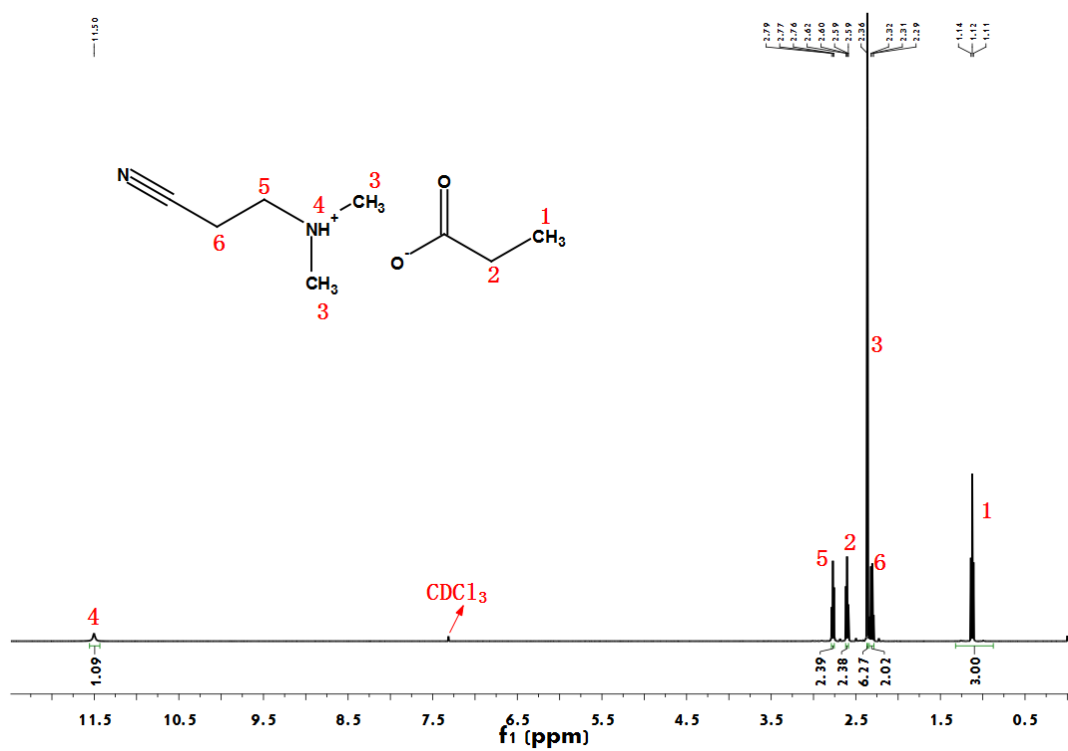

Fig. S1  $^1\text{H}$  NMR spectrum of [DMAPN] $^+$ [Pr] $^-$

**Fig. S2**

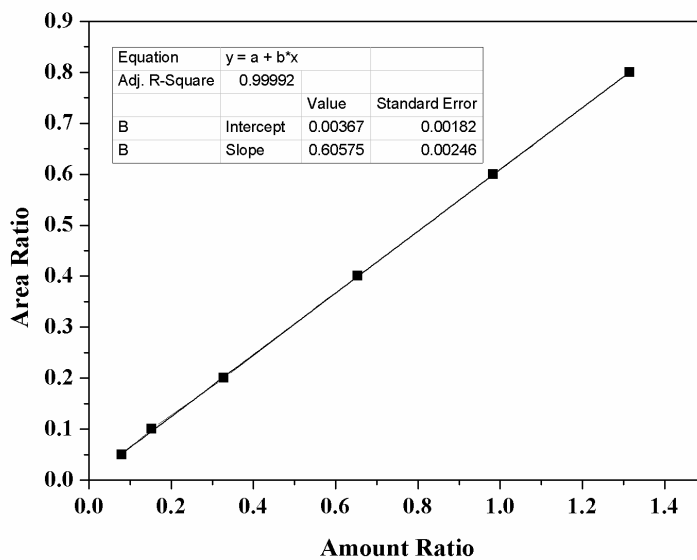

**Fig. S2** Analysis of standard curve(T)

**Fig. S3**

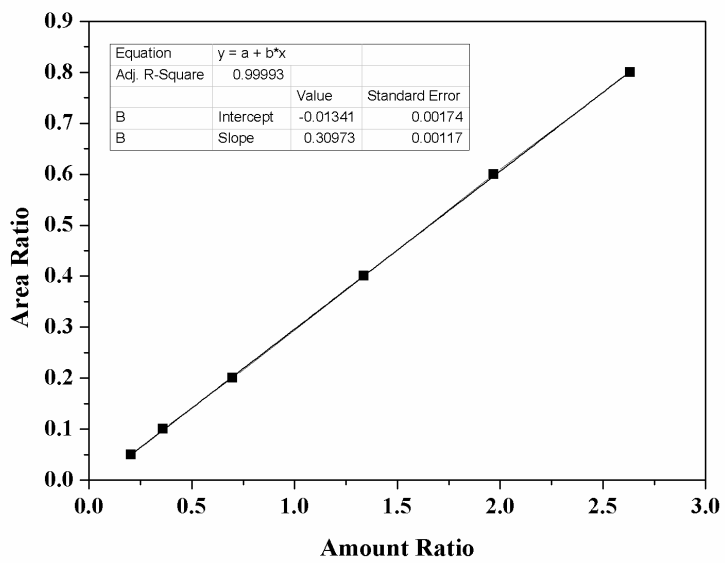

**Fig. S3** Analysis of standard curve(BT)

**Fig. S4**

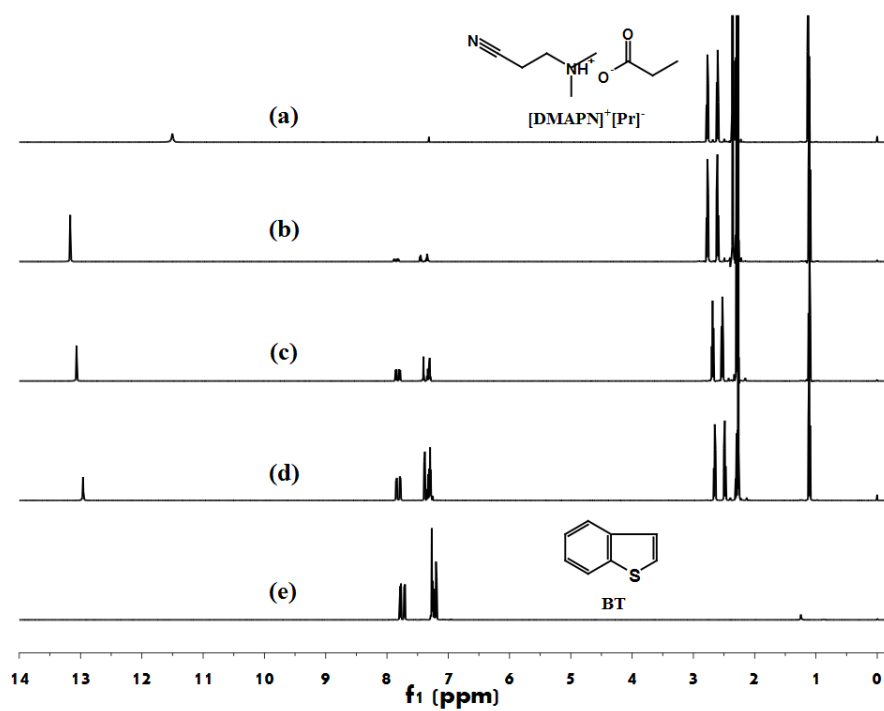

**Fig. S4** <sup>1</sup>H NMR of different molar ratio ([DMAPN]<sup>+</sup>[Pr]<sup>-</sup>/BT)

(a) 1:0 (b) 1:0.1 (c) 1:0.5 (d) 1:1 (e) 0:1
